# Supplementary material for: Adjuvant sequential chemo and radiotherapy improves the oncological outcome in high risk endometrial cancer
Source: PubMed Central journal article supplement — J Gynecol Oncol. 2015 Jul 14;26(4):284–92. doi: 10.3802/jgo.2015.26.4.284 (PMC4620365; doi:10.3802/jgo.2015.26.4.284), 2015-07-14
Supplement: jgo-26-284-s001.pdf [file jgo-26-284-s001.pdf]

**Supplementary Table 1.** Sites of relapse

| Site                  | Stage I-II | Stage III | Total     |
|-----------------------|------------|-----------|-----------|
| Pelvic                | 16         | 14        | 30        |
| Vagina                | 6          | 2         | 8         |
| Pelvic central        | 7          | 7         | 14        |
| Pelvic lateral        | 3          | 5         | 8         |
| Distant               | 18         | 18        | 36        |
| Lung                  | 4          | 8         | 12        |
| Bone                  | 3          | 0         | 3         |
| Aortic node           | 6          | 5         | 11        |
| Peritoneal            | 2          | 3         | 5         |
| Brain                 | 0          | 1         | 1         |
| Multiple distant site | 3          | 1         | 4         |
| Pelvic+ distant       | 2          | 8         | 10        |
| Not available         | 1          | 1         | 2         |
| <b>Total</b>          | <b>37</b>  | <b>41</b> | <b>78</b> |
