# Supplementary material for: Adjuvant sequential chemo and radiotherapy improves the oncological outcome in high risk endometrial cancer
Source: PubMed Central journal article supplement — J Gynecol Oncol. 2015 Jul 14;26(4):284–92. doi: 10.3802/jgo.2015.26.4.284 (PMC4620365; doi:10.3802/jgo.2015.26.4.284), 2015-07-14
Supplement: jgo-26-284-s002.pdf [file jgo-26-284-s002.pdf]

**Supplementary Table 2.** Patients characteristics according to lymphadenectomy

| Parameter               | No lymphadenectomy (n=89) | Pelvic +/-aortic lymphadenectomy (n=165) | p-value* |
|-------------------------|---------------------------|------------------------------------------|----------|
| Age (yr)                |                           |                                          | 0.253    |
| ≤65                     | 51 (57.3)                 | 103 (62.4)                               |          |
| >65                     | 38 (42.7)                 | 62 (37.6)                                |          |
| Stage                   |                           |                                          | <0.001   |
| IB                      | 28 (31.5)                 | 33 (20.0)                                |          |
| II                      | 33 (37.1)                 | 40 (24.2)                                |          |
| IIIA                    | 26 (29.2)                 | 28 (17.0)                                |          |
| IIIB                    | 2 (2.3)                   | 6 (3.6)                                  |          |
| IIIC                    | 0 (0)                     | 58 (35.2)                                |          |
| Myometrial invasion (%) |                           |                                          | 0.507    |
| No                      | 0                         | 0                                        |          |
| ≤50                     | 26 (29.2)                 | 47 (28.5)                                |          |
| >50                     | 63 (70.8)                 | 118 (71.5)                               |          |
| Grade                   |                           |                                          | 0.134    |
| 1 and 2                 | 37 (41.6)                 | 82 (49.7)                                |          |
| 3                       | 52 (58.4)                 | 83 (50.3)                                |          |
| LVSI                    |                           |                                          | 0.213    |
| Negative                | 62 (69.7)                 | 104 (63.8)                               |          |
| Positive                | 27 (30.3)                 | 59 (36.2)                                |          |
| Adjuvant therapy        |                           |                                          | 0.224    |
| No                      | 20 (22.5)                 | 35 (21.2)                                |          |
| EBRT                    | 41 (46.1)                 | 57 (34.6)                                |          |
| Chemo                   | 17 (19.1)                 | 42 (25.5)                                |          |
| Sequential chemo-EBRT   | 11 (12.4)                 | 31 (18.8)                                |          |

Values are presented as number (%).

EBRT, external beam radiotherapy; LVSI, lymphovascular space involvement.

\*Fisher exact test or Student t-test.
